# Supplementary material for: Humanized COVID‐19 decoy antibody effectively blocks viral entry and prevents SARS‐CoV‐2 infection
Source: PubMed Central journal article supplement (PMC7799362; doi:10.15252/emmm.202012828), 2020-11-30
Supplement: EMMM-13-e12828-s001.pdf [file EMMM-13-e12828-s001.pdf]

## Appendix Table S1

List of the exact P-values for main and EV figures

| Figure                             | Panel                                       | Comparison                                        | P value                            | Dose response |  |
|------------------------------------|---------------------------------------------|---------------------------------------------------|------------------------------------|---------------|--|
| Figure 2                           | A                                           | buffer vs 0.64 µg/mL ACE2-Fc                      | 0.00048                            |               |  |
|                                    |                                             | buffer vs 1.25 µg/mL ACE2-Fc                      | 0.00103                            |               |  |
|                                    |                                             | buffer vs 2.5 µg/mL ACE2-Fc                       | 0.00010                            |               |  |
|                                    |                                             | buffer vs 5 µg/mL ACE2-Fc                         | 0.00010                            |               |  |
|                                    | E                                           | 50 µg/mL IgG vs 50 µg/mL ACE2-Fc                  | 0.02744                            |               |  |
|                                    | F                                           | 50 µg/mL IgG vs 50 µg/mL ACE2-Fc                  | 0.02490                            |               |  |
| Figure 3                           | D (left)                                    | (293T/ACE2) 100 µg/mL IgG vs 25 µg/mL ACE2-Fc     | 0.00199                            |               |  |
|                                    |                                             | (293T/ACE2) 100 µg/mL IgG vs 100 µg/mL ACE2-Fc    | < 0.00001                          |               |  |
|                                    |                                             | (H1975/ACE2) 100 µg/mL IgG vs 25 µg/mL ACE2-Fc    | 0.00011                            |               |  |
|                                    |                                             | (H1975/ACE2) 100 µg/mL IgG vs 100 µg/mL ACE2-Fc   | 0.00002                            |               |  |
|                                    |                                             | (H1975/ACE2) 25 µg/mL vs 100 µg/mL ACE2-Fc        | 0.02281                            | +             |  |
|                                    | D (right)                                   | (293T/ACE2) 100 µg/mL IgG vs 25 µg/mL ACE2-Fc     | 0.00371                            |               |  |
|                                    |                                             | (293T/ACE2) 100 µg/mL IgG vs 100 µg/mL ACE2-Fc    | < 0.00001                          |               |  |
|                                    |                                             | (H1975/ACE2) 100 µg/mL IgG vs 25 µg/mL ACE2-Fc    | 0.00817                            |               |  |
|                                    |                                             | (H1975/ACE2) 100 µg/mL IgG vs 100 µg/mL ACE2-Fc   | 0.00001                            |               |  |
|                                    |                                             | (H1975/ACE2) 25 µg/mL vs 100 µg/mL ACE2-Fc        | 0.01009                            | +             |  |
| Figure 4                           | A                                           | (293T/ACE2) 100 µg/mL IgG vs 25 µg/mL ACE2-Fc     | 0.03492                            |               |  |
|                                    |                                             | (293T/ACE2) 100 µg/mL IgG vs 50 µg/mL ACE2-Fc     | 0.00749                            |               |  |
|                                    |                                             | (293T/ACE2) 100 µg/mL IgG vs 100 µg/mL ACE2-Fc    | 0.00301                            |               |  |
|                                    |                                             | (H1975/ACE2) 100 µg/mL IgG vs 25 µg/mL ACE2-Fc    | 0.02698                            |               |  |
|                                    |                                             | (H1975/ACE2) 100 µg/mL IgG vs 50 µg/mL ACE2-Fc    | 0.00227                            |               |  |
|                                    |                                             | (H1975/ACE2) 100 µg/mL IgG vs 100 µg/mL ACE2-Fc   | 0.00144                            |               |  |
|                                    |                                             | (293T/ACE2) 12.5 µg/mL vs 50 µg/mL ACE2-Fc        | 0.00552                            | +             |  |
|                                    |                                             | (293T/ACE2) 12.5 µg/mL vs 100 µg/mL ACE2-Fc       | 0.00966                            | +             |  |
|                                    |                                             | (293T/ACE2) 25 µg/mL vs 50 µg/mL ACE2-Fc          | 0.04592                            | +             |  |
|                                    |                                             | (293T/ACE2) 25 µg/mL vs 100 µg/mL ACE2-Fc         | 0.00477                            | +             |  |
|                                    |                                             | (293T/ACE2) 50 µg/mL vs 100 µg/mL ACE2-Fc         | 0.01345                            | +             |  |
|                                    |                                             | (H1975/ACE2) 12.5 µg/mL vs 50 µg/mL ACE2-Fc       | 0.00249                            | +             |  |
|                                    |                                             | (H1975/ACE2) 12.5 µg/mL vs 100 µg/mL ACE2-Fc      | 0.00111                            | +             |  |
|                                    | (H1975/ACE2) 25 µg/mL vs 50 µg/mL ACE2-Fc   | 0.02319                                           | +                                  |               |  |
|                                    | (H1975/ACE2) 25 µg/mL vs 100 µg/mL ACE2-Fc  | 0.00928                                           | +                                  |               |  |
|                                    | (H1975/ACE2) 50 µg/mL vs 100 µg/mL ACE2-Fc  | 0.04645                                           | +                                  |               |  |
|                                    |                                             | D                                                 | Control vs 100 µg/mL ACE2-Fc       | 0.00017       |  |
|                                    |                                             |                                                   | Control vs 300 µg/mL ACE2-Fc       | 0.00013       |  |
| Figure 5                           | A                                           | (w/o trypsin) 100 µg/mL IgG vs 100 µg/mL ACE2-Fc  | 0.02034                            |               |  |
|                                    |                                             | (w/o trypsin) 100 µg/mL IgG vs 200 µg/mL ACE2-Fc  | 0.01803                            |               |  |
|                                    |                                             | (with trypsin) 200 µg/mL IgG vs 200 µg/mL ACE2-Fc | 0.01739                            |               |  |
|                                    |                                             | (w/o trypsin) 6.25 µg/mL vs 100 µg/mL ACE2-Fc     | 0.03824                            | +             |  |
|                                    |                                             | (w/o trypsin) 6.25 µg/mL vs 200 µg/mL ACE2-Fc     | 0.03591                            | +             |  |
|                                    |                                             | (w/o trypsin) 12.5 µg/mL vs 100 µg/mL ACE2-Fc     | 0.00914                            | +             |  |
|                                    |                                             | (w/o trypsin) 12.5 µg/mL vs 200 µg/mL ACE2-Fc     | 0.00681                            | +             |  |
|                                    |                                             | (w/o trypsin) 50 µg/mL vs 100 µg/mL ACE2-Fc       | 0.04631                            | +             |  |
|                                    | (w/o trypsin) 50 µg/mL vs 200 µg/mL ACE2-Fc | 0.03604                                           | +                                  |               |  |
|                                    |                                             | B                                                 | 100 µg/mL IgG vs 100 µg/mL ACE2-Fc | 0.02888       |  |
| 100 µg/mL IgG vs 200 µg/mL ACE2-Fc |                                             |                                                   | 0.00918                            |               |  |
|                                    |                                             | 6.25 µg/mL ACE2-Fc vs 50 µg/mL ACE2-Fc            | 0.02908                            | +             |  |

|            |   |                                                    |         |   |
|------------|---|----------------------------------------------------|---------|---|
|            |   | 6.25 µg/mL ACE2-Fc vs 100 µg/mL ACE2-Fc            | 0.01567 | + |
|            |   | 6.25 µg/mL ACE2-Fc vs 200 µg/mL ACE2-Fc            | 0.00648 | + |
|            |   | 12.5 µg/mL ACE2-Fc vs 100 µg/mL ACE2-Fc            | 0.02174 | + |
|            |   | 12.5 µg/mL ACE2-Fc vs 200 µg/mL ACE2-Fc            | 0.00779 | + |
|            |   | 25 µg/mL ACE2-Fc vs 200 µg/mL ACE2-Fc              | 0.01284 | + |
|            |   | 50 µg/mL ACE2-Fc vs 200 µg/mL ACE2-Fc              | 0.01983 | + |
|            | F | 400 µg/mL IgG vs 200 µg/mL ACE2-Fc                 | 0.00217 |   |
|            |   | 400 µg/mL IgG vs 400 µg/mL ACE2-Fc                 | 0.00519 |   |
| Figure 6   | B | NTU3 IgG vs ACE2-Fc                                | 0.00198 |   |
|            |   | NTU13 IgG vs ACE2-Fc                               | 0.00794 |   |
|            |   | NTU14 IgG vs ACE2-Fc                               | 0.00967 |   |
|            |   | NTU25 IgG vs ACE2-Fc                               | 0.00216 |   |
|            |   | NTU27 IgG vs ACE2-Fc                               | 0.00473 |   |
|            | C | NTU14 IgG vs ACE2-Fc                               | 0.00184 |   |
|            |   | NTU25 IgG vs ACE2-Fc                               | 0.00014 |   |
|            |   | NTU27 IgG vs ACE2-Fc                               | 0.00035 |   |
| Figure 7   | B | buffer vs 20 µg/mL ACE2-Fc                         | 0.01640 |   |
|            |   | buffer vs 40 µg/mL ACE2-Fc                         | 0.01600 |   |
|            |   | buffer vs 60 µg/mL ACE2-Fc                         | 0.01282 |   |
|            | C | (CD107a) 40 µg/mL ACE2 vs 40 µg/mL ACE2-Fc         | 0.02719 |   |
|            |   | (IFN $\gamma$ ) 40 µg/mL ACE2 vs 40 µg/mL ACE2-Fc  | 0.00009 |   |
|            |   | (TNF- $\alpha$ ) 40 µg/mL ACE2 vs 40 µg/mL ACE2-Fc | 0.02603 |   |
| Figure EV4 |   | (293T/ACE2) 100 µg/mL IgG vs 25 µg/mL ACE2-Fc      | 0.00133 |   |
|            |   | (293T/ACE2) 100 µg/mL IgG vs 50 µg/mL ACE2-Fc      | 0.00058 |   |
|            |   | (293T/ACE2) 100 µg/mL IgG vs 100 µg/mL ACE2-Fc     | 0.00029 |   |
|            |   | (H1975/ACE2) 100 µg/mL IgG vs 25 µg/mL ACE2-Fc     | 0.03371 |   |
|            |   | (H1975/ACE2) 100 µg/mL IgG vs 50 µg/mL ACE2-Fc     | 0.01211 |   |
|            |   | (H1975/ACE2) 100 µg/mL IgG vs 100 µg/mL ACE2-Fc    | 0.00723 |   |
