# Supplementary material for: Humanized COVID‐19 decoy antibody effectively blocks viral entry and prevents SARS‐CoV‐2 infection
Source: PubMed Central journal article supplement (PMC7799362; doi:10.15252/emmm.202012828), 2020-11-30
Supplement: EMMM-13-e12828-s002.pdf [file EMMM-13-e12828-s002.pdf]

## Expanded View Figures

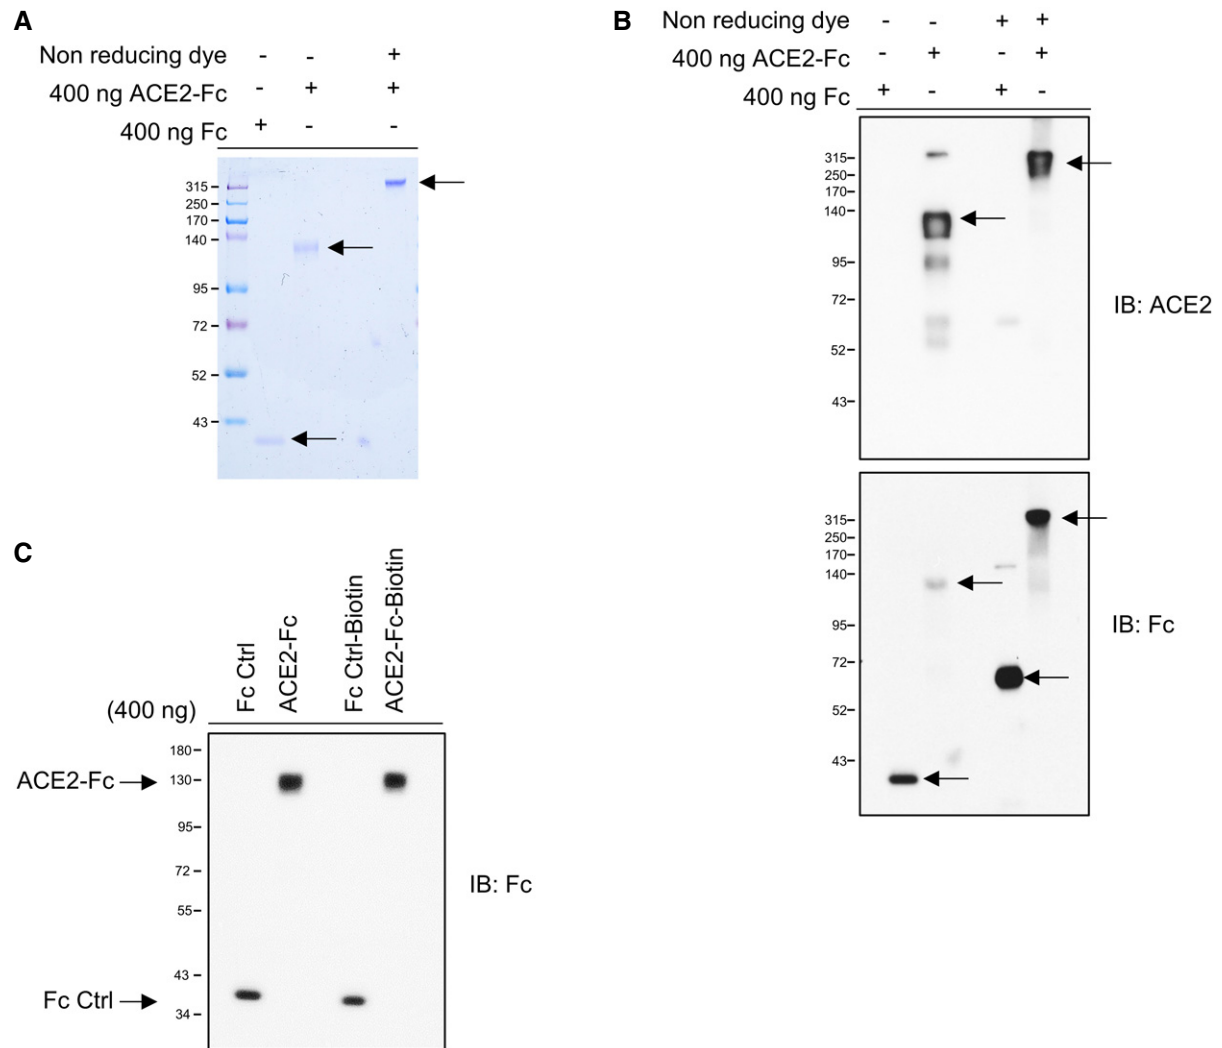

**Figure EV1. Coomassie Brilliant Blue staining and immunoblotted sodium dodecyl sulfate-polyacrylamide gel electrophoresis (SDS-PAGE) for ACE2-Fc.**

- A The purity and molecular size of purified ACE2-Fc. The ACE2-Fc in the supernatants were purified by Protein G Sepharose (Merck). A single band of ACE2-Fc was observed by Coomassie Brilliant Blue staining using reducing or nonreducing loading dye. The black arrows indicate the location of the induced target proteins.
- B Recognition of the decoy antibody by anti-ACE2 antibody and anti-human IgG Fc antibody. Purified ACE2-Fc formed homodimers in nonreducing SDS-PAGE. The black arrows indicate the location of the induced target proteins.
- C The purity of biotin-labeled ACE2-Fc or Fc control was immunoblotted with an anti-human IgG Fc antibody. IB: immunoblotted with the indicated antibodies.

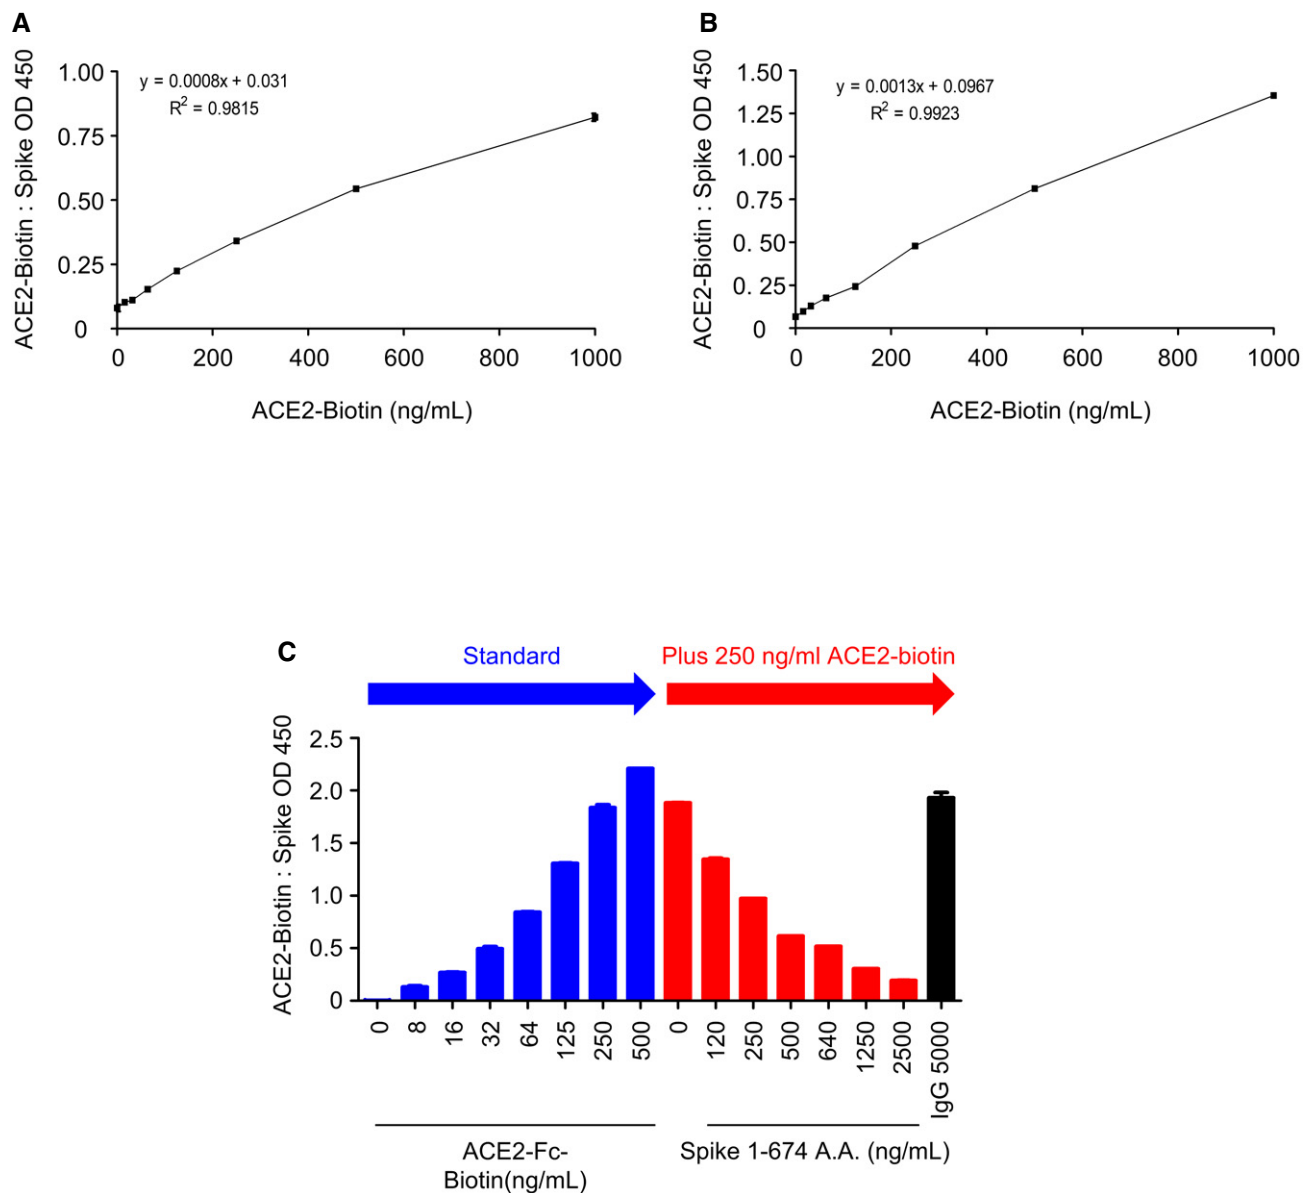

**Figure EV2. ELISA binding curve of ACE2-Fc to the Spike protein.**

A, B ACE2-Fc was serially diluted and dispensed into wells coated with Spike 1–674 (S1) (A) or Spike 319–591 (RBD-SD1) (B), and the binding activity was analyzed by ELISA.

C The soluble form of Spike 1–674 protein blocked the ACE2-Biotin: Spike 1–674 interaction. RBD: receptor-binding domain; SD: connector domain. Error bars represent the standard deviation (SD),  $n = 2$ .

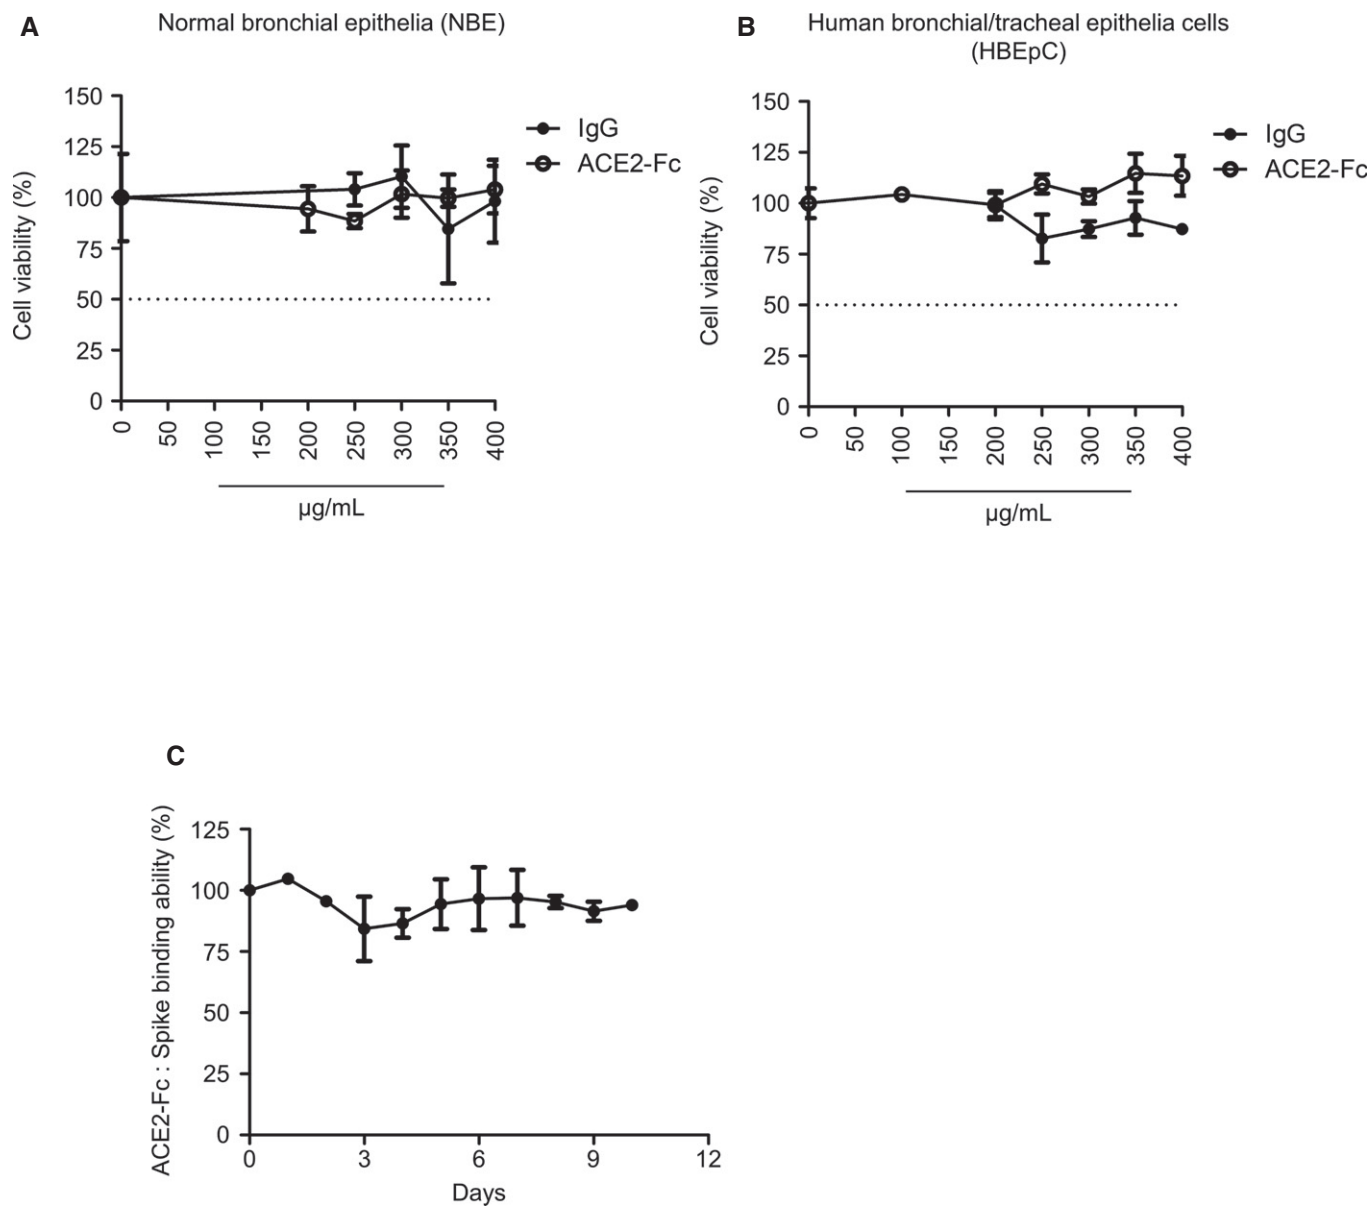

**Figure EV3. In vitro cytotoxicity and plasma stability and of ACE2-Fc.**

- A, B Two normal human bronchial epithelial cells were incubated with ACE2-Fc and normal human IgG at the indicated concentrations for 72 h, and cell viability was analyzed by MTS assay. Error bars represent the standard deviation (SD),  $n = 2$  in left;  $n = 3$  in right. The dotted line represents the 50% of cell viability.
- C *In vitro* serum stability of ACE2-Fc. ACE2-Fc was incubated with 50% normal human serum at 37°C for up to 10 days. At the indicated time points, samples were collected to quantify the binding ability of ACE2-Fc to Spike proteins by ELISA. Error bars represent the standard deviation (SD),  $n = 3$ . Experiments were performed at least three times with similar results.

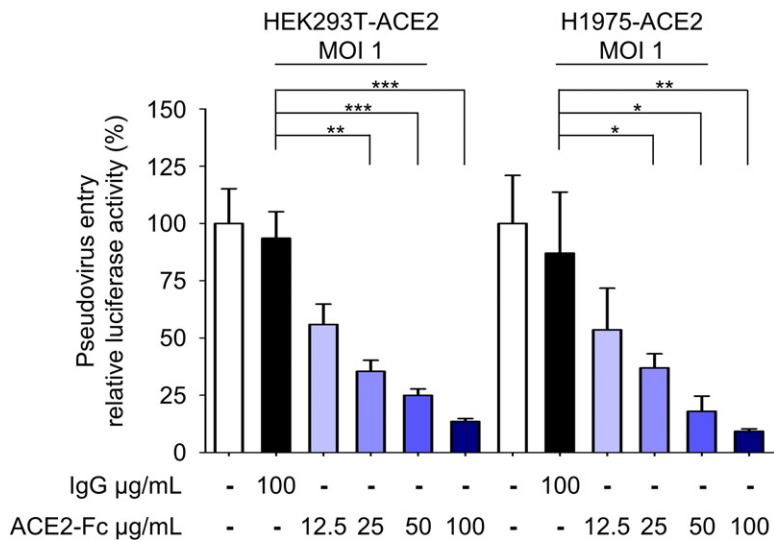

**Figure EV4. Inhibition of pseudovirus entry by ACE2-Fc at higher virus input.**

The same experimental protocol was conducted as in Fig 4A, except with a higher virus input. ACE2-Fc blocked Spike-expressing pseudotyped lentivirus entry into HEK293T-ACE2 and H1975-ACE2 cells. MOI (multiplicity of infection) = 1. Virus entry was determined by measuring luciferase activity. R.I. U: (R.I. U = relative infection unit. Error bars represent the standard deviation (SD),  $n = 3$ . Statistical analysis was performed by unpaired two-tail  $t$ -test. \* $P < 0.05$ , \*\* $P < 0.01$ , \*\*\* $P < 0.001$ .

## w/o TPCK-trypsin

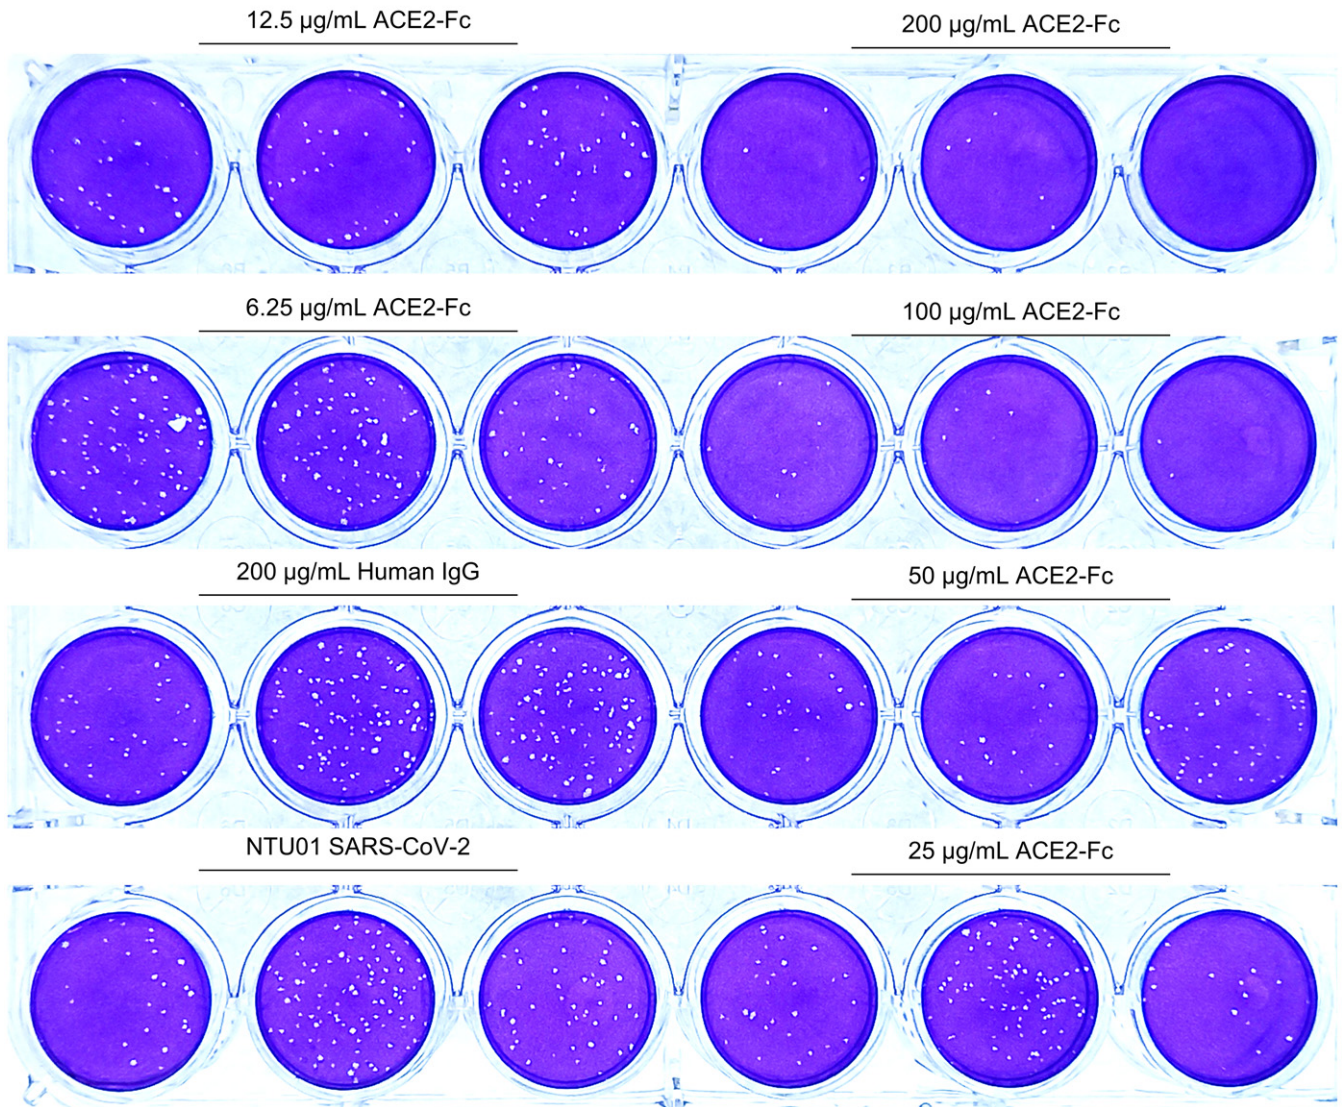

## w/ TPCK-trypsin

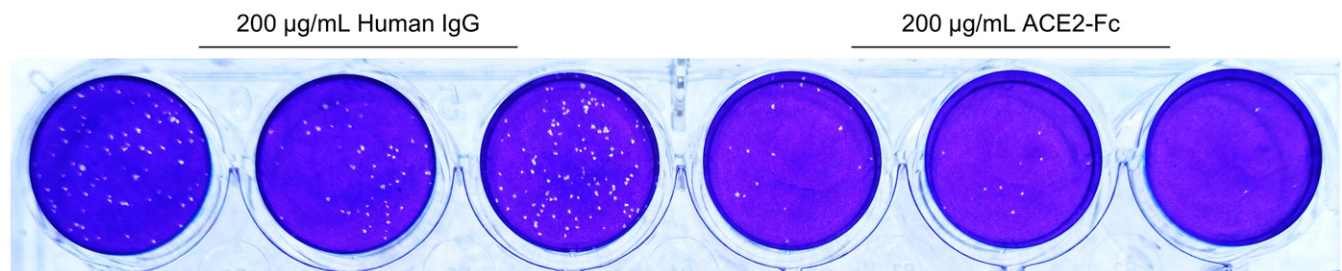**Figure EV5. Plaque reduction assay.**

SARS-CoV-2 (4000 plaque-forming units, PFUs) was incubated with antibodies at the indicated amounts for 1 h at 37°C before adding to the Vero E6 cell monolayer for another hour. After the mixtures were removed, the cells were washed and replaced with overlay medium for 5 days. Plaque formation was determined by crystal violet staining. NTU01: SARS-CoV-2 that was isolated from a female patient suffering from COVID-19 infection at National Taiwan University Hospital.
